# Supplementary material for: Alkaline-promoted Ni based ordered mesoporous catalysts with enhanced low-temperature catalytic activity toward CO2 methanation
Source: Royal Society of Chemistry journal article supplement (doi:10.1039/c7ra01673e), 2017-01-01
Supplement: c7ra01673e1.pdf [file c7ra01673e1.pdf]

## Electronic Supplementary Information (ESI)

### Figure captions:

**Figure S1** X-ray diffraction pattern of the fresh 10Ni/Al<sub>2</sub>O<sub>3</sub> catalyst.

**Figure S2 (1)** Nitrogen adsorption-desorption isotherms and **(2)** pore size distribution curves of the fresh and 50 h spent 10Ni/Al<sub>2</sub>O<sub>3</sub> catalysts.

**Figure S3 (1)** H<sub>2</sub>-TPR and **(2)** Ni 2p XPS profiles of the fresh 10Ni/Al<sub>2</sub>O<sub>3</sub> catalyst.

**Figure S4** Arrhenius plots for CO<sub>2</sub> reaction rate over OMA-10Ni<sub>x</sub>Mg catalysts.

**Figure S5** TEM images of the 50 h spent 10Ni/Al<sub>2</sub>O<sub>3</sub> catalyst.

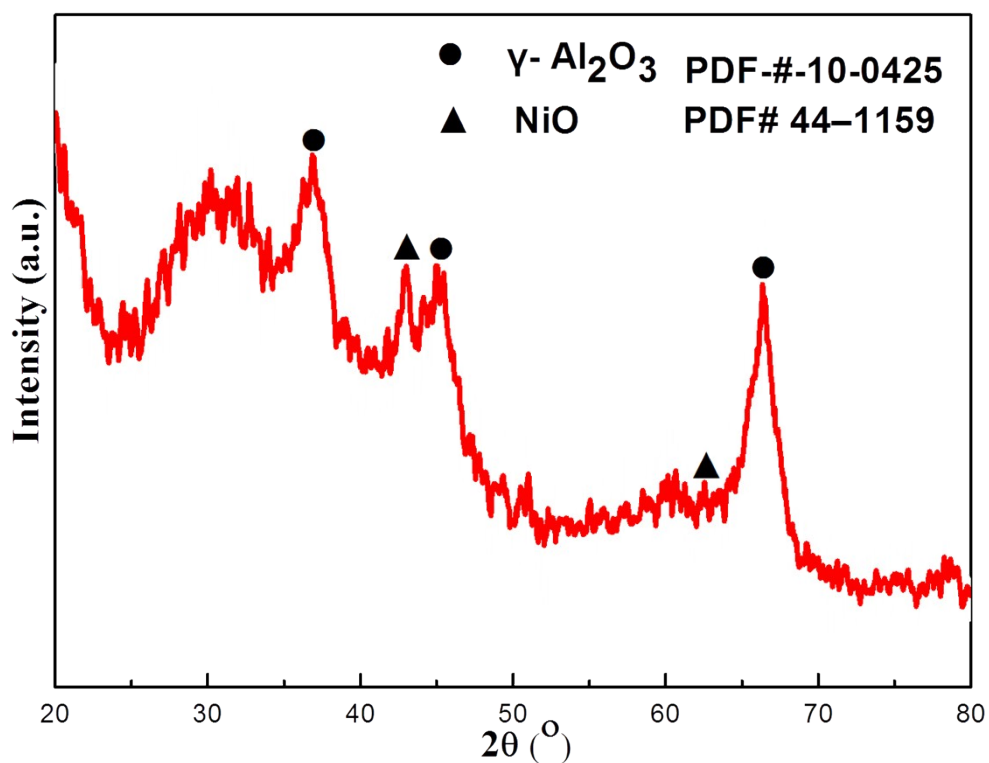

**Figure S1**

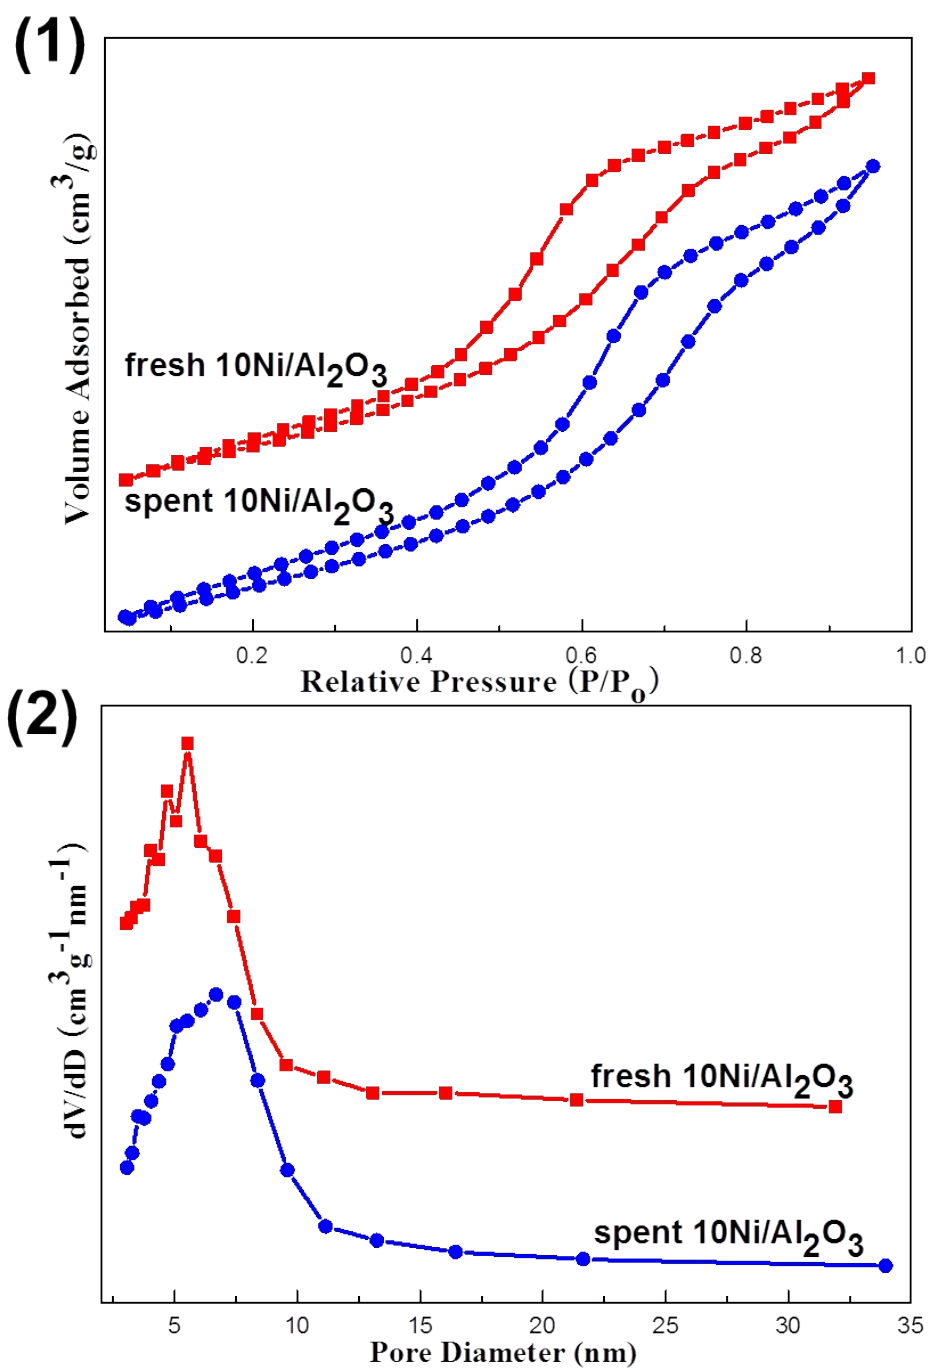

Figure S2

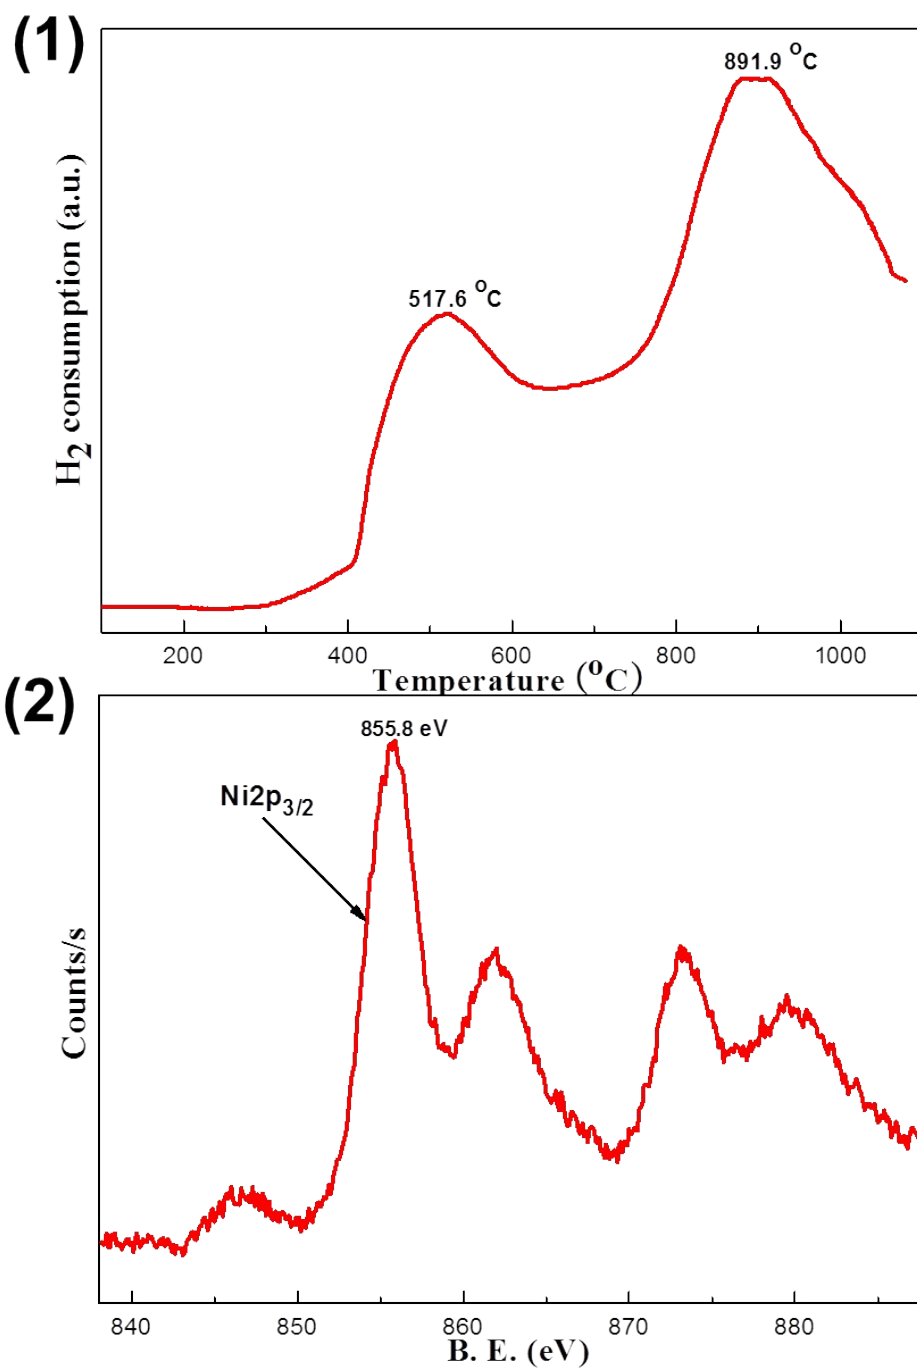

Figure S3

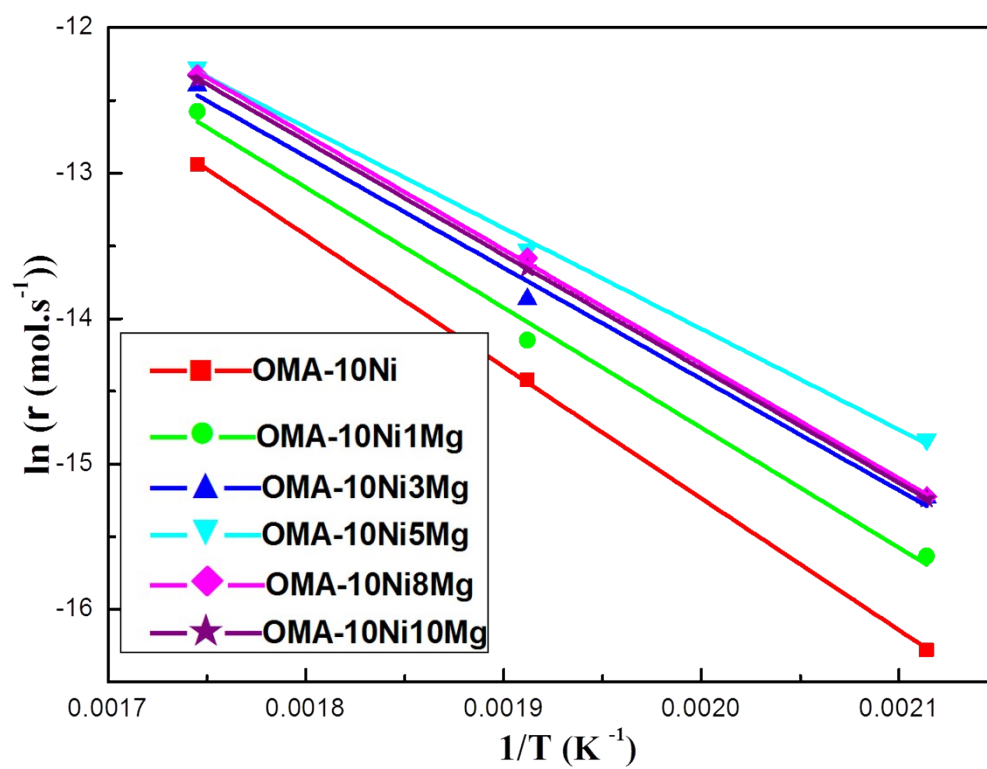

Figure S4

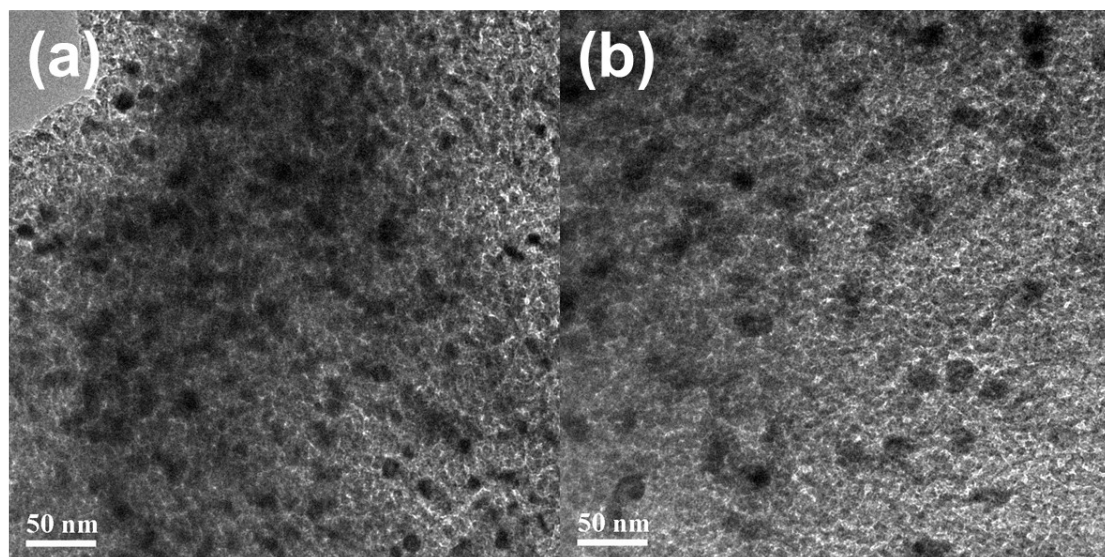

**Figure S5**
